# A Mechanical Model of Early Somite Segmentation

Priyom Adhyapok<sup>1</sup>, Agnieszka M Piatkowska<sup>2</sup>, Michael J Norman<sup>3</sup>,

Sherry G Clendenon<sup>1</sup>, Claudio D Stern<sup>2</sup>, James A Glazier<sup>1</sup>, Julio M Belmonte<sup>3\*</sup>

<sup>1</sup>Indiana University Bloomington, USA; <sup>2</sup>UCL, United Kingdom; <sup>3</sup>NC State University, USA

\*corresponding author: [jbelmon2@ncsu.edu](mailto:jbelmon2@ncsu.edu)

## Abstract:

*The clock-and-wavefront model (CW) hypothesizes that the formation of somites in vertebrate embryos results from the interplay of molecular oscillations with a wave traveling along the body axis. This model however does not explain how molecular information is interpreted by cells to modulate their rearrangement into somites. Here we performed Scanning Electron Microscopy (SEM) on the pre-somitic mesoderm (PSM) of chicken embryos at stages 11-12 to describe in detail the cell shape changes occurring along the axis of the PSM. This reveals a wave of epithelialization of the dorsal PSM that precedes somite segmentation. Signs of spatially periodic apical constriction appear in this layer starting at least 3-4 somite lengths caudal to the most recently formed somite. The sizes of these clusters correspond to the typical diameter of chicken somites. We propose that a mechanical instability process leads to the separation of cells into these structures and positions the future inter-somite boundaries. We present a model in which a wave of apical constriction leads to increasing tension and periodic failure of adhesion junctions within the dorsal epithelial layer of the PSM, thus positioning somite boundaries.*

25 *This model can produce spatially periodic segments whose size depends on the speed*  
26 *of the contraction wave ( $W$ ) and the rate of increase of apical contractility ( $\Lambda$ ). The  $\Lambda/W$*   
27 *ratio determines whether this mechanism produces spatially and temporally regular or*  
28 *irregular segments, and whether segment sizes increase with the wave speed (scaling)*  
29 *as in the CW model. We discuss the limitations of a purely mechanical model of somite*  
30 *segmentation and the role of biomechanics along with CW during somitogenesis.*

31

32 **Keywords:** Somitogenesis, biomechanics, mesenchymal-epithelial transition,  
33 mechanical instability, segmentation

34

35

## 36 **INTRODUCTION**

37

38 Somitogenesis in vertebrate development sequentially and periodically creates  
39 metameric epithelial balls (somites) along the elongating embryo body from bilateral  
40 rods of loosely connected mesenchymal cells called pre-somitic mesoderm (PSM). As  
41 cells leave the rostral/anterior (head) end of the PSM to form each somite, new cells  
42 continuously move from the tail bud to join the PSM at the caudal/posterior (tail) end of  
43 the embryo [1]. At any given rostral-caudal position, a pair of nearly equal-sized somites  
44 form simultaneously on both sides of the neural tube, between the ectoderm and the  
45 endoderm. These transient structures are the precursors of vertebrae, ribs and many

46 skeletal muscles; many birth defects are associated with a failure in one or more steps  
47 in this long developmental process [2].

48

49 Somitogenesis is strikingly robust to perturbations (both spatial and temporal). Changes  
50 in the total number of embryonic cells or in the rate of new cell addition at the caudal  
51 end lead to compensating changes in the size and timing of somite formation so that the  
52 embryo eventually produces the same final number of somites as in normal  
53 development [3-4]. One way to achieve this conservation of final somite number is for  
54 the size of the somites to increase linearly (*scale*) with the speed of the caudal-moving  
55 position of the determination front or with the rate at which cells join the caudal end of  
56 the PSM.

57

58 Models seeking to explain somite formation include the 'cell cycle model', which couples  
59 the timing of segmentation to the progression of cells through the cell-cycle and a cell-  
60 intrinsic gating mechanism [5-7] and reaction-diffusion models [8-9]. Currently, the most  
61 widely accepted family of models employ a 'clock and wavefront' (CW) mechanism  
62 which combines caudally progressing waves of determination and differentiation with an  
63 intracellular oscillator which determines cell fate based on its phase at the moment of  
64 determination [10]. Following the identification of the first oscillating transcripts (*hairy1*  
65 and *hairy2*) in the PSM [11], many computer simulations of varying complexity have  
66 implemented different CW models. Most CW models reproduce the experimentally  
67 observed scaling of somite size with clock period, wavefront speed and rate of  
68 elongation of the PSM [12-14].

69

70 Recent experiments have shown that somite-like structures can form without either a  
71 clock or a wavefront [9,15]. The ability of somites to form without either a clock or a  
72 wavefront suggests that we should consider other mechanisms that could lead to  
73 spatially and temporally periodic sequential division of the PSM into regular segments.  
74 Moreover, recent experiments by Nelemans and colleagues showed that applied  
75 tension along the rostral-caudal axis can induce the formation of intersomitic boundaries  
76 in locations not specified by CW signaling [16], suggesting that mechanical mechanisms  
77 may be important in generating intersomitic boundaries.

78

79 In 2009, Martins and colleagues imaged the morphology of cells during chicken  
80 somitogenesis *in vivo*, showing that cells elongate, crawl and align with each other as  
81 they form a somite [17]. Importantly, their observations show that cells epithelialize  
82 gradually during somite formation, with epithelialization beginning before segments  
83 separate from each other. This finding is consistent with other reports showing that PSM  
84 cells gradually increase the density of cell-cell adhesion molecules [18] and decrease  
85 their motility [19-20] as they approach the time of the physical reorganization associated  
86 with somite formation. Moreover, several decades ago, scanning electron microscopy  
87 (SEM) observations of the PSM in a variety of species led to the suggestion that “pre-  
88 somite” like structures, named “somitomers”, precede the condensation of cells into  
89 somites by at least 2-3 somite lengths [21-22]. However, these observations were made  
90 mostly in randomly fractured embryos along various planes and it is difficult to  
91 determine the progression of somitogenesis from them.

92

93 Here we took a new look at the PSM cells to investigate this early organization in more  
94 detail. Consistent with previous work, our observations show that dorsal PSM cells  
95 undergo an early maturation process, forming an epithelial monolayer along the  
96 ectoderm boundary, beginning long before somite formation. This pre-somitic epithelium  
97 also shows signs of a pre-segmentation process, with cohorts of cells forming arched  
98 tissue segments of roughly the length of a somite diameter.

99

100 These observations suggest that periodic tissue segmentation and somite boundary  
101 positioning could result from a mechanical instability mechanism, similar to what is seen  
102 in periodic cracking of materials subjected to stress. We developed a model of the  
103 dorsal epithelial monolayer where the observed boundaries between dorsal segments  
104 arise from the break of contact between neighboring cells due to increased apical  
105 tension between cells. We simulated this scenario with a 2D computational model of a  
106 cross-section of the epithelial monolayer and showed that spatial periodicity in segment  
107 sizes can be explained by a simple mechanical model without a clock. We also showed  
108 that this model can produce either constant-size segments or segments whose size  
109 increases (*scales*) with wave speed and inverse rate of increase of apical contractility. A  
110 roughly constant ratio of the wave speed to apical contractility build-up rate defines the  
111 boundary between these two domains. A second ratio also predicts when this  
112 mechanism produces spatially and temporally regular segments from irregular  
113 segments.

114

115

## 116 **RESULTS**

117

### 118 ***Early signs of boundary specification***

119

120 To investigate the beginning of epithelialization, we performed 3D Scanning Electron  
121 Microscopy (SEM) of chick embryos fixed at various stages of somitogenesis, fractured  
122 as precisely as possible along parasagittal or transverse planes [27]. We then manually  
123 defined the contour of each individual PSM cell and calculated their aspect ratios  
124 (Figure 1A,B).

125

126 Our observations show that a dorsal layer of PSM cells begins to epithelialize at least as  
127 early as 4-5 somite-lengths caudal to the most recently formed somite (S1).

128 Furthermore, cells within this dorsal epithelium form a series of cohorts at least 3-4  
129 somite lengths caudal to the forming somite (Figure 1A). Cells near the dorsal surface  
130 within these cohorts are usually wedged shaped, with their apical (ventral facing) sides  
131 more constricted than their basal (dorsal facing) sides. The sizes of these cohorts are  
132 regular and roughly correspond to the rostral-caudal length of the future somites.

133

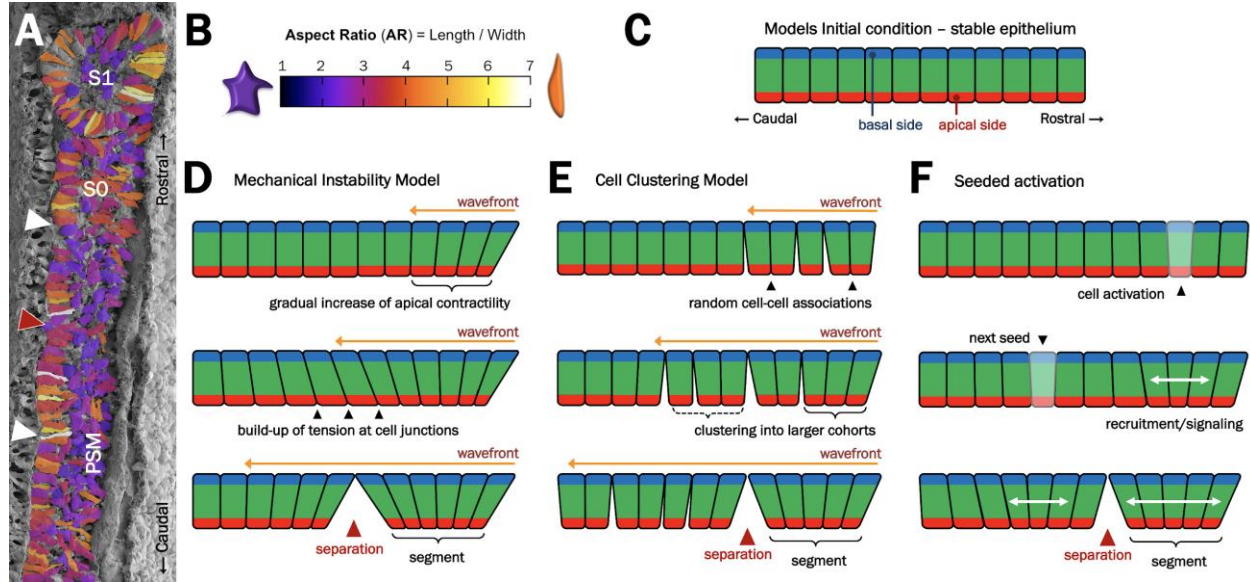

134

135 **Figure 1 – Early signs of pre-somitic epithelium segmentation and proposed models of segment**

136 **formation**

137 (A) SEM images of para-sagittally sectioned chicken embryos shows the epithelialization of dorsal PSM

138 cells at least 5 somite-lengths caudal (left) to the S1 somite. Cells are colored according to their aspect

139 ratio, as shown in (B). White arrowheads show the positions of segment boundaries. (C-F) Models of

140 mechanical-instability mechanism of tissue segmentation. (C) Epithelialized cells, with defined apical (red)

141 and basal (blue) sides form a rostral (right)-caudal (left) monolayer along the dorsal side of the PSM. (D)

142 Mechanical instability model: a caudal-moving wavefront of myosin activation (orange arrows) initiates

143 apical constriction of the cells in the monolayer eventually leading to the periodic segmentation of the

144 tissue. (E) Cell condensation model: a caudal-moving wavefront of maturation (orange arrows) initiates

145 random cell-cell groupings that eventually organizes the tissue into regularly sized cohorts. (F) Seeded

146 activation mechanism: instead of a continuous wave, small groups of cells are activated and rearrange

147 neighboring cells into a segment.

148

149

150 ***A mechanical model of dorsal PSM pre-patterning for segmentation***

151  
152 The correlation between cohort size with somite rostral-caudal length and tear  
153 positioning with projected somite boundaries suggest that these structures are  
154 precursors of the future inter-somite boundary. But how do they arise? Figure 1D-F  
155 illustrates some possible mechanistic models, including a cell clustering model with a  
156 continuous wavefront (Fig. 1E) and other variations where changes in cell behaviors do  
157 not progress continuously from caudal to rostral (Fig. 1F).

158  
159 Here, we take the convergence of the cells' apical sides within the cohort as an  
160 indication that cells are undergoing apical constriction as the PSM matures. Apical  
161 constriction is the result of contractile forces generated by myosin activity at the cells'  
162 apical side, which often bring neighboring cells together and give them a wedge shape  
163 [28-32]. It is known that when apical contractile forces exert too much load on junctional  
164 adhesion sites, tissue tears appear, as observed in *Drosophila* embryos [33-34]. We  
165 postulate that this mechanism - a mechanical instability model - may be behind the pre-  
166 segmentation pattern we observe: a caudally travelling activation wave induces apical  
167 constriction along the maturing PSM cells (Figure 1D), leading to a buildup of cell-cell  
168 apical tension (Figure 1E) that eventually subdivides the monolayer into regularly sized  
169 segments (Figure 1F). This is the model we explore in this paper.

170  
171 The model has three main variables: the speed at which this caudally-travelling wave  
172 passes through the tissue ( $W$ ), the rate at which each pair of activated cells increases  
173 its apical contractility ( $A$ ), and the maximum tension a cell pair can sustain before the



174 cells break their connection to each other ( $T_{break}$ ). For any given value of  $T_{break}$ , we  
175 expect average segment sizes to increase proportionally with  $W$  and inversely with  $\Lambda$ . In  
176 the following subsections we implement two different versions of this model to explore  
177 whether and under which conditions this process can produce spatially and temporally  
178 regular segments.

179

### 180 ***Linear elastic model of tissue segmentation***

181

182 We first implemented the mechanical model of the interaction between adjacent cells in  
183 the dorsal monolayer as a series of springs connecting a chain of point objects. The  
184 model creates motion by linearly increasing the spring constant over time at rate  $\Lambda$ , with  
185 a delay between spring activation based on how far along the chain the spring is ( $W$ ). At  
186 each time step, the acceleration due to spring forces is calculated and used to set up a  
187 system of  $2N$  first order ordinary differential equations (ODEs) with time dependent  
188 coefficients, where  $N$  is the number of cells (points) in the system. If at any given time  
189 step the tension of a spring exceeds  $T_{break}$ , the spring constant is set to zero for the  
190 remainder of the simulation, effectively breaking the spring. The time and location of  
191 each break is recorded. For more details on the model implementation, see

192 *Computational Models.*

193

194 For short times, each cell pair tension evolves with the same patterns, first increasing  
195 roughly linearly over time after activation, until eventually turning over, decreasing for a  
196 short time and increasing again at a slower rate (Supplemental Figure 1A). During this

197 process, the subsequent cell pair tensions follow a similar pattern, but time-delayed and  
198 reaching higher tensions before turning over. Eventually one spring reaches the  
199 threshold tension, setting the first break. We found the size (or position) of the first  
200 break, which we call the segment size ( $S$ ), to be proportional to  $W$  and inversely  
201 proportional to  $\Lambda$ , as expected (Supplemental Figure 1B).

202

203 However, after the first break happens and tension is lost on one side of the monolayer,  
204 the cell centers (the point objects) begin to collapse quickly and the cell positions start  
205 to overlap (Supplemental Figure 1C). From there onwards the physical requirement that  
206 the order of the cells must be preserved is no longer guaranteed and the subsequent  
207 breaking points lose their biological meaning. Addition of spring resting lengths and  
208 ceilings on the maximum spring constant did not improve the oscillatory behavior and  
209 cell position overlaps after the first break.

210

### 211 ***A Cellular Potts implementation of the mechanical instability model***

212

213 The above results suggest that a more realistic representation of the dorsal cells that  
214 takes into account cell shapes, viscosity and thermal fluctuations, is needed for the  
215 implementation of a mechanical instability model of tissue segmentation. In the  
216 subsections that follow we implemented a stochastic Cellular Potts Model  
217 (CPM)/Glazier-Graner-Hogeweg (GGH) model version of the dorsal tissue  
218 segmentation process. (For more details see *Computational Models*) In this model, the  
219 cells are not points, but spatially extended objects similar to the schematic cells in

220 Figure 1C-F with a width and height; apical, basal and core domains; and elastic  
221 connections between neighboring apical domains that follows the same rules as in the  
222 purely elastic model. We first characterize the model behavior with different values of a  
223 fixed spring constant ( $\lambda_A$ ) and simultaneous rate of increase of apical contractility on all  
224 cells ( $\Lambda$ ) before exploring the gradual, caudally-moving wavefront of apical constriction  
225 activation.

226

### 227 ***Tension profiles as a function of number of cells and constriction strength***

228

229 We first test our model by creating small epithelial monolayers composed of 4 to 16  
230 cells of fixed aspect ratio  $AR = 2$  (Figure 2A). The strength of apical contractility of all  
231 cell pairs was increased simultaneously at a fixed build up rate of  $\Lambda = 0.05$ , from  $\lambda_A = 0$   
232 up to a maximum value of  $\lambda_A = 600$ , without allowing apical links to break. We then  
233 observe the shape of the tissue and the average cell pair tension (Eq. 6) over 20,000  
234 simulation time units (defined in terms of Monte Carlo Steps (MCS)), after  $\lambda_A$  has  
235 reached its maximum value. As the number of cells in the monolayer increases, cell  
236 pairs in the middle of the segment are under higher tension compared to cell pairs near  
237 the periphery (Figure 2B,C). This forms the premise of our model - as the tissue  
238 becomes larger, more tension is accumulated between cell pairs, thus predisposing the  
239 tissue to break into smaller segments when a breaking tension threshold is present.

240

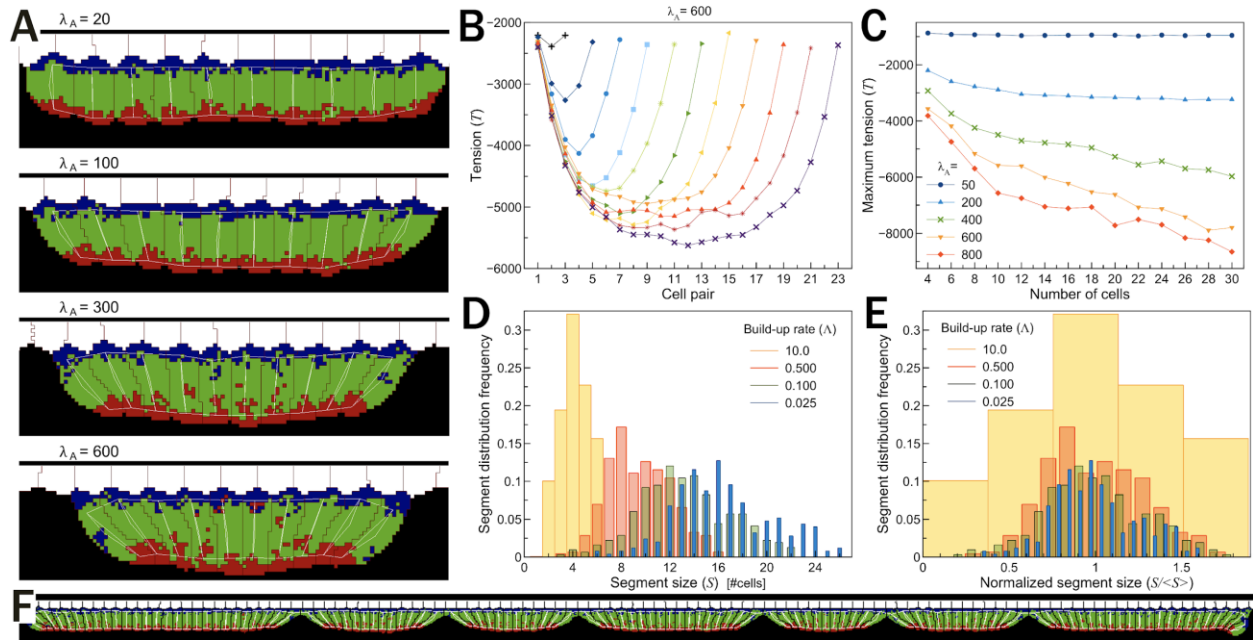

241  
 242 **Figure 2 - Tension and segment size distributions for fixed tissue sizes and simultaneous increase**  
 243 **in contractility**

244 (A) Snapshots of 4 simulations of 10 cells with different levels of maximal apical contractility strength. The  
 245 tissue becomes more constricted with larger values of  $\lambda_A$ . (White - ectodermal tissue; black - non-  
 246 modeled PSM; cells domain colors as in Figure 1C-F; vertical white lines - internal distance constraints  
 247 between cell domains (Eq. 3); horizontal white lines - distant constraints between domains of neighboring  
 248 cells (Eq. 5)). (B) Plot of average apical tension (Eq. 6) between cell pairs at the end of multiple  
 249 simulations with different numbers of cells (from 4 to 24). In all these simulations  $\lambda_A$  is set to 600. (C) Plot  
 250 of maximum cell pair tension versus the number of cells in the tissue for different maximal values of  $\lambda_A$ .  
 251 (D-E) Histogram of distribution of segment sizes (D) and normalized segment sizes (E) for different build-  
 252 up rates of apical contractility. (F) Snapshot of a simulation with  $\Lambda = 0.05$  showing a wide distribution of  
 253 segment sizes.

254

255

256 ***Simultaneous activation of apical contractility leads to irregularly sized segments***

257

258 Next, we combine the simultaneous activation with the breaking of the apical links by  
259 imposing a tension threshold  $T_{break} = -7500$  after which the link between the apical  
260 domains of neighboring cells is broken. As in the previous section, in these simulations  
261 the strength of apical contractility is increased linearly from  $\lambda_A = 20$  up to a maximum  
262 value of  $\lambda_A = 600$  at different rates of apical contractility build-up ( $\Lambda = d\lambda/dt$ ). Since now  
263 any cell contact is initially equally susceptible to break, we obtain a broad distribution of  
264 segment sizes (Figure 2D-F), with the average segment size increasing as the build-up  
265 rate decreases (Figure 2D). The shape of the distribution, however, remains the same  
266 for all values of  $\Lambda$  (Figure 2E), except when the rates are bigger than 10, where we  
267 found that most cell pairs break. The data in Figure 2D-F are from simulations with  
268 periodic boundary conditions, but the results are qualitatively the same for simulations  
269 with a large number of cells ( $N > 400$ ) and fixed boundaries (Supplemental Figure 2).  
270 We conclude that a simultaneous activation of constriction activity is insufficient to  
271 produce a regular pattern of pre-segments similar to those seen in our SEM  
272 observations of embryos (Figure 1A).

273

### 274 ***Gradual and sequential activation of apical contractility leads to tissue*** 275 ***segmentation***

276

277 Next, we investigated whether sequential activation of apical constriction can slice a  
278 tissue to generate regularly sized segments. From now on, all simulations have a large  
279 number of cells and a caudally moving front of activation that sequentially initiates a  
280 gradual and linear increase of the strength of apical contractility of cell pairs. The wave

281 speed  $W$  and build-up rate of apical contractility  $\lambda$  will be varied systematically around  
282 their base values (see Table1). In addition, apical cell pairs will have a maximum  
283 tension load  $T_{break}$ , after which their links break and a tear may appear between the  
284 apical region of those cells.

285  
286 Figure 3A shows a time series of a zoomed-in section of a simulation with 115 cells  
287 where 4 tissue segments form. With the exception of the first and last two segments  
288 (due to boundary conditions), all segments are of similar size ( $\langle S \rangle = 11.36 \pm 1.45$ )  
289 and segmentation occurs at similar time intervals ( $\langle \tau \rangle = 3442.37 \pm 587.87$ ) for our  
290 standard set of parameter values (see Table1). We also looked at the evolution of the  
291 tension profile for 2 sequential segments. As the wavefront of activation passes, the  
292 tension between cell pairs gradually increases, with the rostral-most pair with the higher  
293 tension (Figure 3B and green lines in Figure 3C). After the formation of the rostral-most  
294 boundary/tear the pattern inverts, with the rostral-most cell pairs now more relaxed and  
295 the caudal-most pairs now under higher tension (compare green and blue lines in  
296 Figure 3C). Formation of the caudal-most boundary relaxes the tension of these pairs  
297 and the segment tension profile has now a symmetrically convex shape with an average  
298 lower tension compared with the intermediate steps (black lines in Figure 3C). The  
299 same process repeats itself in the formation of the subsequent segments.

300



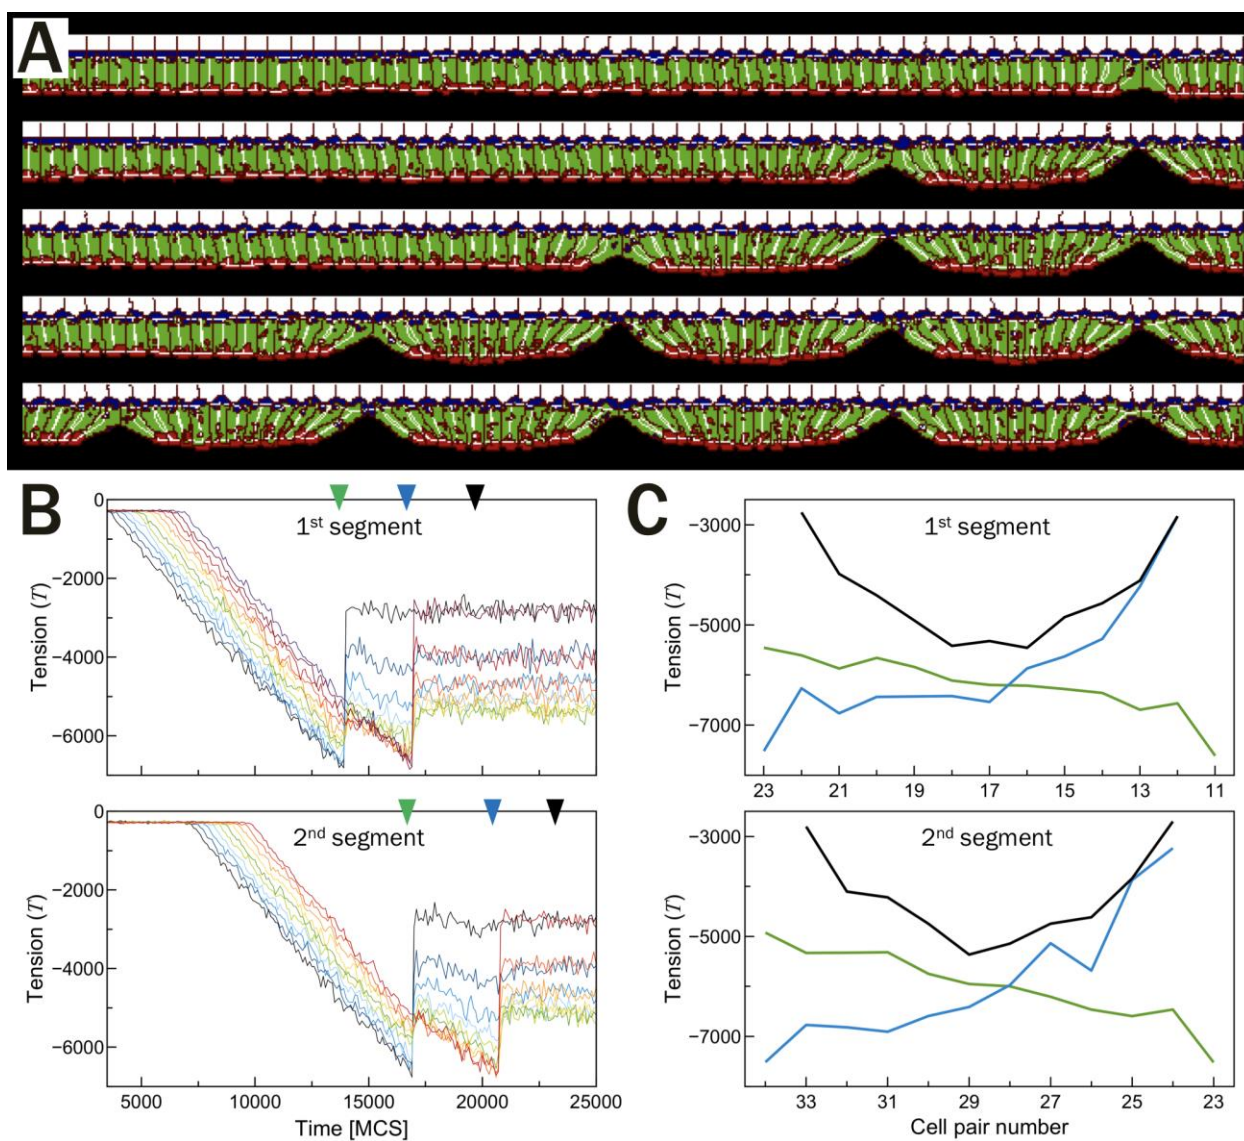

301  
302 **Figure 3 - Tissue segmentation from a caudally propagating wave initiating apical constriction**  
303 (A) Time-series of a simulation showing the sequential segmentation of a tissue due to a linear increase  
304 of apical cytoskeletal activity as cells are progressively activated from rostral (right) to caudal (left). Colors  
305 as in Figure 3A and parameters are from Table 1. Snapshots taken at the approximate moment the  
306 separation occurs (17000, 21000, 24000, 28000 and 31000 MCS). (B) Time evolution of cell pair tensions  
307 in the regions of 2 consecutive segments. Lines are plotted beginning with the rostral-most pair of cells for  
308 each segment. (C) Tension profiles for the 2 tissue segments shown in (B). Each line corresponds to the  
309 same-color arrowheads in (B) and indicate three different events - formation of the rostral segment

310 boundary (green), formation of caudal segment boundary (blue), and some time after the caudal event  
311 occurs (black).

312

313

### 314 ***Segment size scaling with wave speed and rate of apical constriction***

315

316 The clock and wavefront model was proposed to explain how somite size can adjust to  
317 variations of embryo size [10]: all else being equal, a faster clock produces smaller  
318 somites, while a faster wavefront generates larger somites. We now investigate if our  
319 mechanical model of segmentation has the same scaling features: does a faster wave  
320 of activation ( $W$ ) lead to larger segments? How does average segment size change with  
321 different build-up rates of apical contractility ( $\lambda$ )? In the results that follow we  
322 systematically varied both parameters and all data points were averaged over 5  
323 simulation replicas.

324

325 We first fixed the build-up rate of apical contractility  $\lambda$  and varied the wave speed  $W$ . We  
326 observe two regimes of the average segment size  $\langle S \rangle$  with respect to the wave  
327 speed. For wave speeds below a critical value ( $< W^*$ ) average segment size  $\langle S^* \rangle$   
328 was constant, but increased as a power law with exponents close to  $\frac{1}{4}$  for faster wave  
329 speeds ( $> W^*$ ) (Figure 4A). The critical values of the wave speed  $W^*$  and average  
330 segment size  $\langle S^* \rangle$  for the change from constant segment size to the scaling regime  
331 depends on the value of the build-up rate  $\lambda$  (Figure 4B). These results suggest that the  
332 discrete spatial compartmentalization of the tissue in cell units poses a lower limit on  
333 segment size as a function of  $\lambda$  (Figure 4B). In fact, our simulations in absence of a



334 wave already indicate that the maximum tension a cell pair can reach depends on the  
335 number of cells within a forming segment (Figure 2B), so for slow waves we expect the  
336 tears to always occur at regular size intervals.

337

338 The average distance between apical constriction activation and boundary formation  $\langle D \rangle$   
339 showed a less surprising behavior with an approximate linear scaling with wave  
340 speed (Figure 4C): the faster the wave, the larger the distance between the wavefront  
341 and the boundaries. Changes in the base value of  $\lambda$  only shifted the curves, with lower  
342 build-up rates increasing the distance between activation and boundary formation. The  
343 average time interval between the formation of successive boundaries  $\langle \tau \rangle$  depends  
344 only on  $W$ , and not on  $\lambda$ , with faster wave speeds decreasing the segmentation time as  
345 a power law with exponent  $-0.80 \pm 0.008$  (Figure 4D).

346

347 Next we fixed the wave speed  $W$  and varied the build-up rate of apical contractility  $\lambda$ .  
348 Average segment sizes  $\langle S \rangle$  decrease logarithmically with higher build-up rates, but  
349 became constant after a critical value of  $\lambda^*$  (Supplemental Figure 3A,B). As before,  
350 segment sizes outside the scaling regime ( $\langle S^* \rangle$ ) depends on the value of the wave  
351 speed  $W$  used in the simulations (Supplemental Figure 3B). Again, these results can be  
352 understood in light of the way cell pair tension increases with segment size (Figure 2B).  
353 For slow build-up rates ( $\lambda < \lambda^*$ ), the sole factor determining segment size is the wave  
354 speed, with faster waves adding more cells to the forming segment before the boundary  
355 formation (Figure 4A). For higher build-up rates ( $\lambda > \lambda^*$ ), however, the rate of cell addition

356 is not fast enough to overcome the increase in tension profile, which itself is a function  
 357 of tissue size (Figure 2B).

358

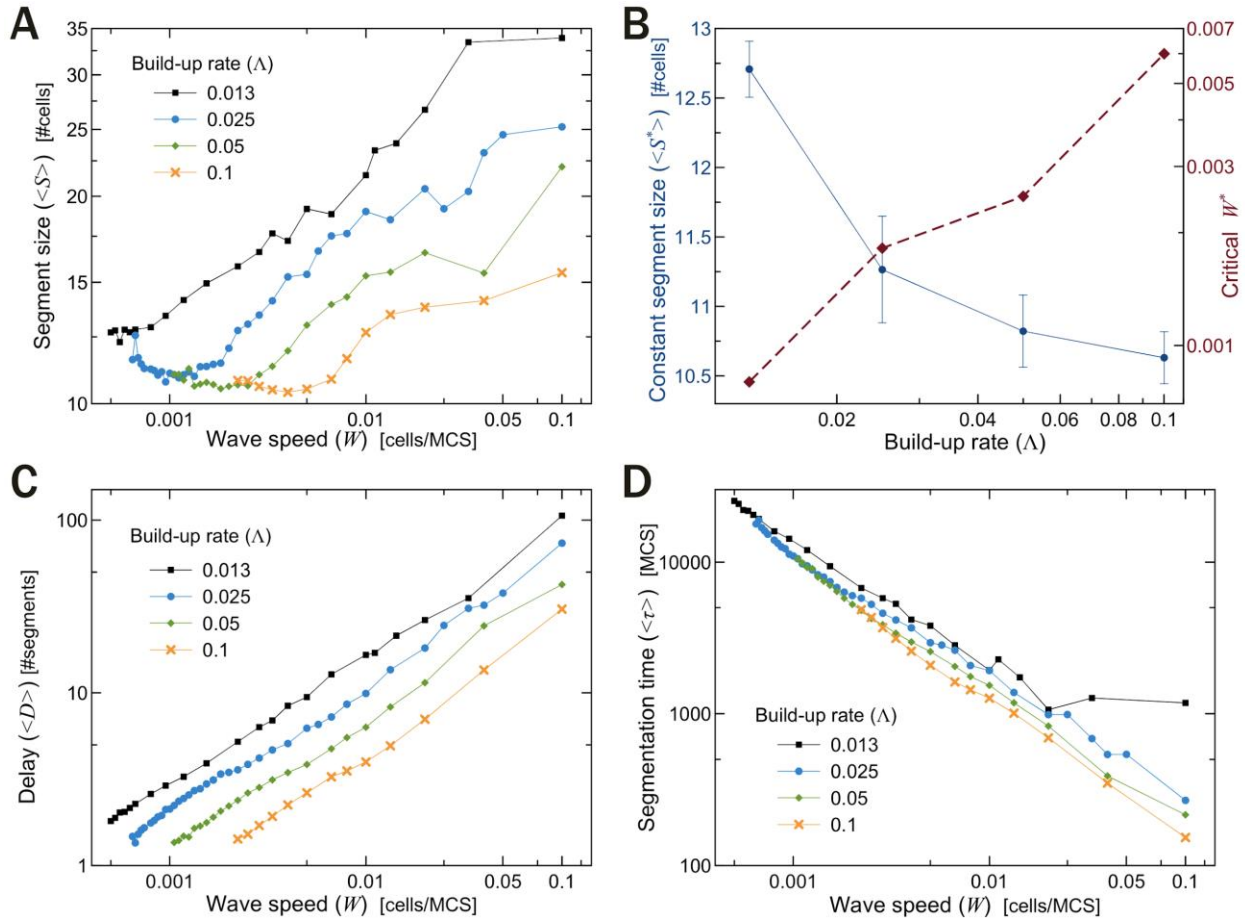

359

### 360 Figure 4 - Segmentation as a function of wave speed

361 (A) Average segment size  $\langle S \rangle$  as a function of wave speed  $W$ . For slower wave speeds segments are  
 362 of roughly constant size, but increase as a power law for faster wave speeds. (B) Constant segment sizes  
 363  $\langle S^* \rangle$  (blue solid line) and critical wave speeds  $W^*$  (red dashed line) as functions of  $\Lambda$ . (C) Distance  
 364 between activation and boundary formation  $\langle D \rangle$  increases linearly with  $W$ . (D) Average segmentation  
 365 time  $\langle \tau \rangle$  decreases as a power law with  $W^{-0.80 \pm 0.008}$ . (A,C,D) Each line shows a similar behavior for  
 366 different base values of the build-up rate of apical contractility ( $\Lambda$ ).

367

368 The average distance between cell activation and boundary formation  $\langle D \rangle$  decreased  
369 linearly with the build-up rate, as expected: the faster the contractility build-up rate, the  
370 less time it takes for segments to form once all cells are actively constricting  
371 (Supplemental Figure 3C). The average segmentation time  $\langle \tau \rangle$  was similarly  
372 dependent on the build-up rate as on segment size  $\langle S \rangle$ , which was expected, given  
373 that  $\langle S \rangle = W \langle \tau \rangle$  (Supplemental Figure 3D).

374

### 375 ***Ratio of build-up rate to wave speed sets the transition of scaling regimes***

376

377 The critical values of wave-speed  $W^*$  and build-up rate of apical contractility  $\Lambda^*$  for the  
378 transition between constant and segment size scaling regimes shown in Figures 4B and  
379 Supplemental Figure 3B are related. Rescaling of the horizontal axis in Figures 4A and  
380 Supplemental Figure 3A for each curve by their corresponding values of  $\Lambda$  and  $W$ ,  
381 respectively, shows that in both cases, the transition occurs around the same ratio of  
382  $\Lambda/W = 22 MCS^2/cell$  (Figure 5A,B). This allows us to define a boundary transition in  
383 parameter space that separates regions where segment sizes change with variations in  
384 either  $\Lambda$  or  $W$  from regions where the segment sizes remain relatively constant with  
385 changes in one of these parameters (Figure 5C, green and blue regions). Note that we  
386 use the word *constant* in contrast to the size scaling of the segments with respect to  
387 either  $\Lambda$  or  $W$ , there is still a small and gradual change in segment sizes within the green  
388 region in Figure 5C (see Supplemental Figure 4).

389

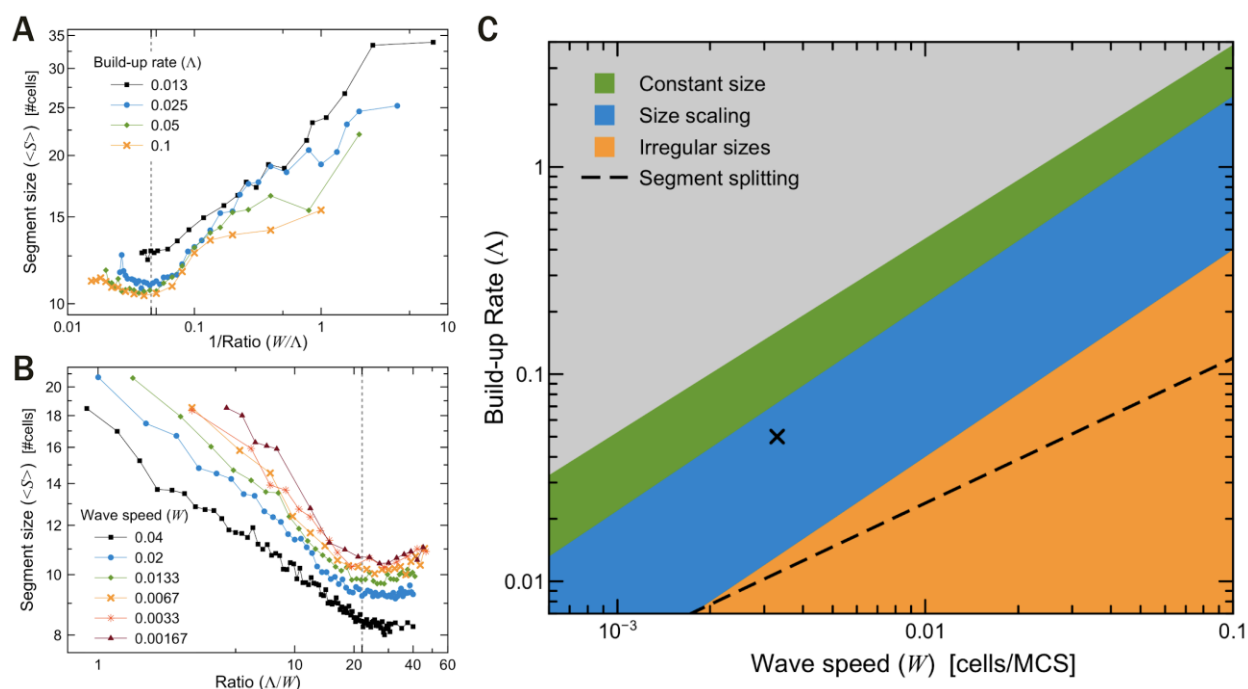

390

391 **Figure 5 -  $\Lambda/W$  sets boundaries between segmentation regimes**

392 (A,B) Rescaled version of Figures 4A and Supplemental Figure 3A, showing average segment size  $\langle S \rangle$

393 as a function of (A) wave speed to build-up rate, and (B) its inverse. Vertical dashed line at  $\Lambda/W = 22$

394 indicate transition threshold between constant size and scaling segment sizes. (C) Parameter space

395 diagram showing regions where the combination of the parameters  $\Lambda$  and  $W$  leads to constant segment

396 sizes (green), scaling segment sizes (blue), or irregularly sized segments. Black dashed line shows

397 transitions from stable to splitting segments. Black X point indicates the reference simulation parameters

398 (see Table 1). Grey region indicates parameters combinations that lead to simulation artifacts.

399

400 The parameter space in Figure 5C also contains a grey region where the combinations

401 of  $\Lambda$  and  $W$  leads to simulation artifacts (among other things, simulated cells decrease

402 their height by around 10% and neighbouring apical compartments separate from each

403 other without breaking their apical links). All data from this region were discarded in our

404 analysis. The orange region and dashed boundary line will be defined momentarily.

405

406 **Segment sizes become irregular for low ratios of build-up rate to wave speed**

407

408 While average segment size increases with higher wave speeds ( $W$ ) or lower build-up

409 rates of apical contractility ( $\Lambda$ ), segment sizes distribution becomes irregular for lower

410 ratios of  $\Lambda/W$  (Figure 6A-D). This can be visualized in plots of segment size variation,

411 calculated as the ratio of standard deviation ( $\sigma$ ) to the mean ( $\langle S \rangle$ ) (Figure 6E,F).

412 When the wave speed is much faster than the build-up rate ( $W \gg \Lambda$ ), a large group of

413 cells starts to constrict at about the same time. In this situation, the memory of the last

414 boundary position is erased, and new tissue tears are more likely to appear anywhere in

415 the tissue.

416

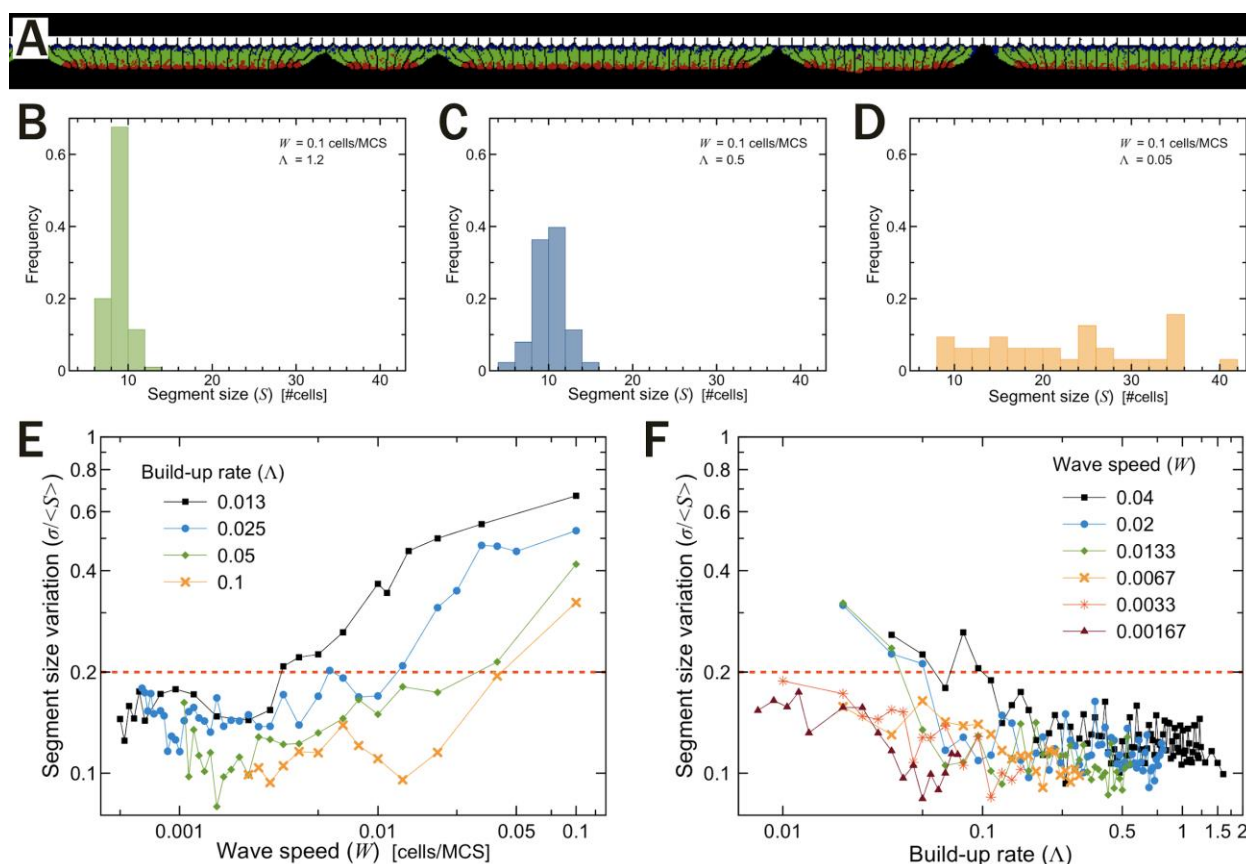

417

418 **Figure 6 - Segment size variation**

419 (A) Typical simulation output showing wide range of segment sizes from the irregular region (orange) of  
420 the parameter space in Figure 5C with  $W=0.03$ ,  $\Lambda = 0.013$ . (B-D) Histogram of segment size distributions  
421 for combinations of  $\Lambda$  and  $W$  in the constant size region (B), scaling region (C), and irregular region (D),  
422 of the parameter space over 5 trials. (E) Segment size variation (std/mean) as a function of build-up rate  
423 of apical cytoskeletal activity  $\Lambda$ . (F) Segment size variation as a function of wave speed  $W$ . (E,F) Dashed  
424 red lines at  $\sigma/\langle S \rangle = 0.2$  indicate the threshold used to determine the region of irregular segment sizes in  
425 Figure 5C.

426  
427 We choose to classify segments as irregular when  $\sigma/\langle S \rangle$  is higher than 0.2. This  
428 corresponds in our parameter space diagram, to a transition from uniform to non-  
429 uniform segments at ratios of  $\Lambda/W \leq 4$ . A similar dependence on  $\Lambda/W$  is observed with  
430 the segmentation time variation ( $\sigma/\langle \tau \rangle$ ), which measures how uniformly distributed is  
431 the time between consecutive boundary formations (see Supplemental Figure 5). A  
432 threshold of  $\sigma/\langle \tau \rangle = 0.33$  can be similarly used to distinguish between regular and  
433 irregular segments. This high variation in segmentation time in the irregular region is  
434 expected, as the time taken to form subsequent tears is an emergent output from our  
435 mechanical model, rather than a direct input related to the oscillation period of the clock  
436 as in the CW model.

437

438 ***Build-up rate and wave speed limit larger segment sizes***

439  
440 The above results show that initial segment sizes increase with faster wave speeds  
441 (Figure 4A) and slower build-up rates of apical contractility (Supplemental Figure 3A).  
442 However, there seems to be a limit on the larger segment sizes. After their initial

443 formation, larger segments are prone to split as the cells within them continue to  
444 increase their apical cytoskeletal activity strength ( $\lambda_A$ ) and tension keeps building up  
445 until a new splitting event occurs near the middle of the formed segment (Figure 7A,B).

446

447 While the occurrence of a splitting event is proportional to the initial segment size  
448 (Supplemental Figure 4), the wave speed  $W$  has a more direct effect on the frequency  
449 of splitting, with higher build-up rates only delaying the appearance of splits (Figure 7D).

450 Together these results suggest that our mechanical model of segmentation sets a  
451 higher limit on segment sizes depending on the speed of the wave with respect to the  
452 build-up rate of apical cytoskeletal activity (Figure 7C,D). Our results, however, did not  
453 point out to a specific ratio of  $\lambda/W$  as predictive of a transition to a higher frequency  
454 ( $>0.1$ ) of splitting events, but rather a nonlinear function  $\lambda = 0.6 * W^{0.7}$  for the boundary  
455 between stable segments and splitting segments (dashed line in Figure 5C).

456



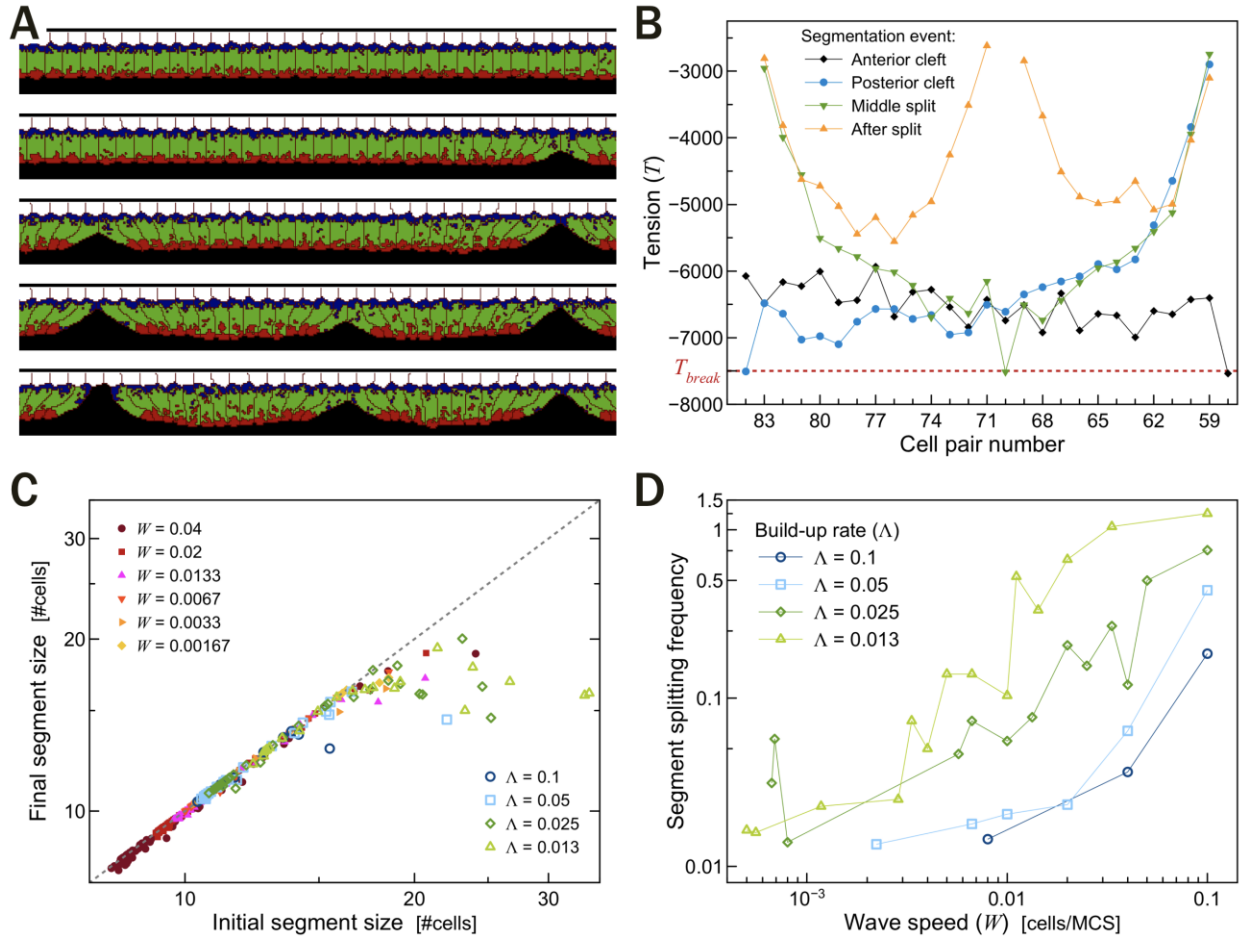

457

458 **Figure 7 - Splitting of Large Segments**

459 (A) Simulation snapshots showing the splitting of a large segment (times, from top to bottom: 47000,  
 460 49000, 52000, 54000 and 56500 MCS). (B) Evolution of the tension profile for the splitting segment  
 461 shown in (A). (C) Plot of average final versus initial segment sizes. Data points at the diagonal gray  
 462 slashed lines indicate no splitting events. (D) Splitting frequency as a function of wave speed  $W$ .

463

464

465 **Segment size as a function of maximum tension load**

466

467 So far, we had used a fixed apical to apical tension breaking threshold of  $T_{break} =$

468  $-7500$ . We now test the effects of varying the threshold tension at which the link



469 between the neighboring cells' apical domains break. At the extreme limit of  $|T_{break}|$   
 470 near zero, the average segment contains only one cell. Conversely, at high enough  
 471 values ( $|T_{break}| > 9500$ ) the tissue never segments and remains a single monolayer. As  
 472 the magnitude of the breaking threshold increases between these ranges, the average  
 473 segment sizes also increase, as expected (Figure 8A). Note however, that the splitting  
 474 frequency is higher for low values of  $|T_{break}|$ , and zero for high values, with segments  
 475 breaking in more than once for threshold values around  $T_{break} = -2000$  (Figure 8B).  
 476

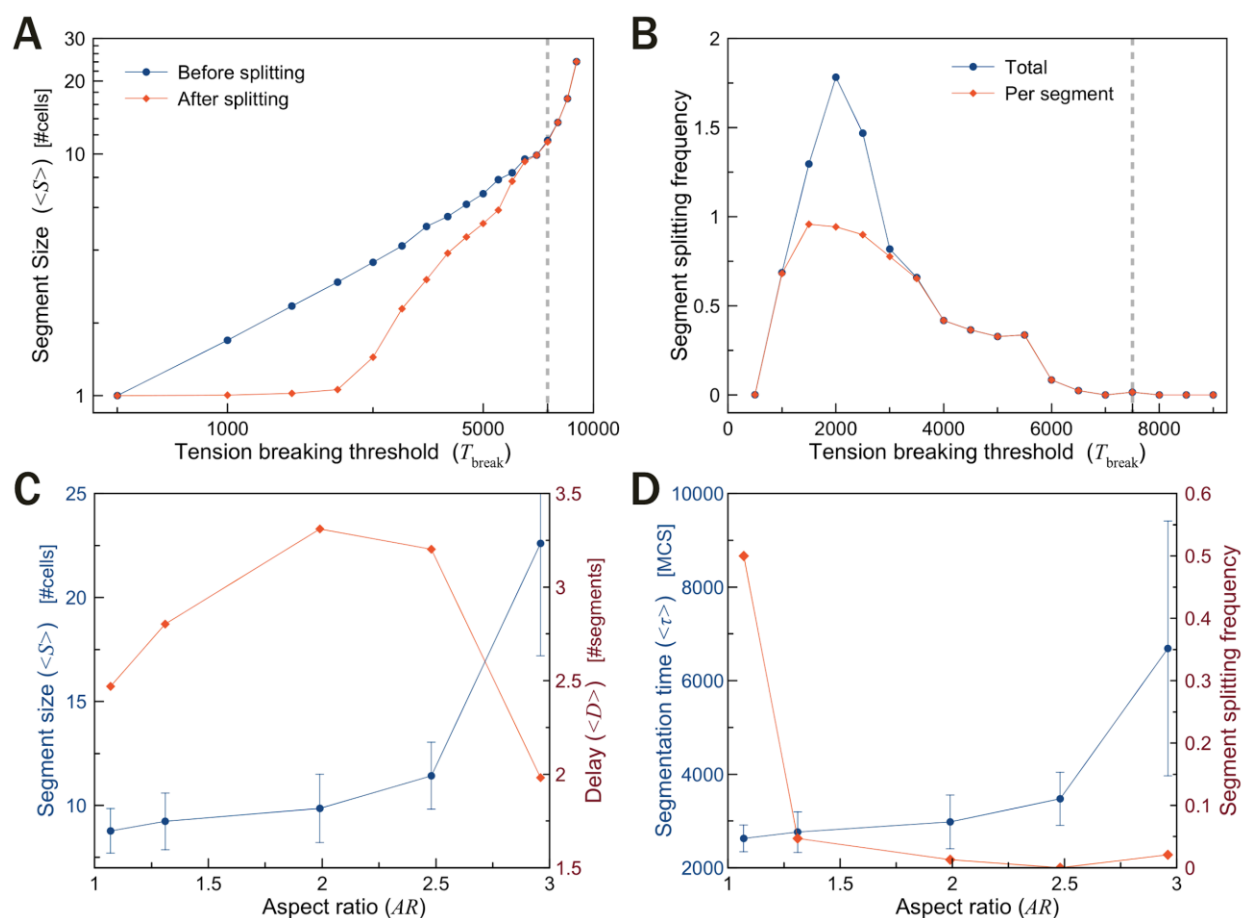

477

478 **Figure 8 - Influence of junctional tension limit and cell shape on segmentation**

479 (A) Average segmentation size  $\langle S \rangle$  as a function of the absolute value of tension breaking point

480  $|T_{break}|$ . Blue lines are initial segment sizes, red lines are segments sizes after splitting. (B) Average

481 number of splitting events per segment as a function of  $|T_{break}|$ . (C) Average segmentation size  $\langle S \rangle$   
482 (blue) and the distance between activation and boundary formation  $\langle D \rangle$  (red) as functions of cell aspect  
483 ratio  $AR$ . (D) Average segmentation time  $\langle \tau \rangle$  (blue) and frequency of segmentation splitting (red) as  
484 functions of cell aspect ratio  $AR$ .

485

486

### 487 **Segmentation as a function of cell shape (aspect ratio)**

488

489 In the pre-somitic tissue, cells elongate dynamically prior and during the process of  
490 boundary formation. We had kept the length of the cell fixed for our previous  
491 simulations and we now evaluate how segment size depends on the aspect ratio of the  
492 cell ( $AR = height/width$ ). Figure 8C shows the average segment size  $\langle S \rangle$  and  
493 distance  $\langle D \rangle$  as a function of cell aspect ratio. As expected, it is easier to pack more  
494 elongated cells into a segment. The distance  $\langle D \rangle$ , however, is a concave curve with  
495 respect to  $AR$  with a maximum around  $AR = 2$ . This can be understood as follows: the  
496 wider the cells, ( $AR < 2$ ) the harder it is to pack them into a segment made of wedge-  
497 shaped cells, so apical tension builds up quickly and tissue separation occurs sooner,  
498 thus reducing both the segmentation time (blue line in Figure 8D) and the distance  
499 between activation and boundary formation compared to the standard case (Figure 8C).  
500 Conversely, the more elongated cells ( $AR > 2$ ), the greater the number of cells that can  
501 be packed into a segment and the longer it takes for consecutive boundaries to form.  
502 However, since the segments themselves are larger,  $\langle D \rangle$ , which is calculated in  
503 terms of segment sizes, also decreases. Figure 8D also shows that the segment  
504 splitting frequency (red line) is significantly higher for low aspect ratios, which can be

505 understood as a result from the packing constraints that expedites the accumulation of  
506 tension between apical cell pairs and make them more prone to splitting.

507

## 508 **DISCUSSION**

509

510 In this paper, we describe a mechanical model of tissue segmentation where a  
511 continuous wave of apical constriction activation coupled with maximum apical tension  
512 load sets the position of future somite boundaries. The model is based on experimental  
513 observations of extensive cell rearrangements during somite formation [17],  
514 observations with somitomeres [21-22] and our own SEM images (Figure 1A)  
515 suggesting that the segmentation process begins dorsally in the PSM at least 4 somite  
516 lengths prior to the formation of the last somite. We interpreted the spatial segmentation  
517 of the dorsal epithelium into similarly sized cohorts of cells as the result of an increased  
518 longitudinal (rostral-caudal) tension between the cells.

519

520 A similar process is known to cause the appearance of periodic cracks on non-biological  
521 thin films subjected to tensile stress [35-36]. Analysis of these films show that the  
522 spacing between these cracks depends on the stress, thickness and toughness of the  
523 film. In these models, however, the stress is usually assumed to be uniform, non-time  
524 varying, and applied externally to the material. One exception is the work by Yuse and  
525 Sano, where a time-varying inhomogeneous thermal stress was applied to a plate  
526 moving between two reservoirs [37-38]. The velocity of the plate and the temperature  
527 difference between the two reservoirs act as control parameters and define a phase

528 space where periodic cracks could transition into other morphologies. Our model on  
529 pre-somitic tissue segmentation differs from these analogies in two ways, firstly, the  
530 material is ductile, and secondly and mostly importantly, the material is not  
531 homogeneous, but subdivided into discrete units (the cells).

532

533 In biology, mechanical forces generated by fibroblasts have been shown to assist in the  
534 remodeling of the external collagen matrix to form self-organized tissue structures [39].

535 Tensile stresses generated by stretching fibroblasts suspended in collagen and  
536 restrained by a glass mesh have also been known to result in aggregations of cells .

537 The self-organization of cells into clusters in the absence of chemical signals led Harris  
538 and colleagues to suggest that mechanical instabilities could act as sources of

539 positional information instead of diffusible factors like morphogens [40]. More recently  
540 the possibility of mechanical instabilities resulting in vertebrate segmentation has also

541 been explored by Truskinovsky and colleagues [41]. Assuming relaxation of junctional  
542 adhesion sites as the PSM elongates, the model identifies that the number of somites

543 generated by their pre-patterning mechanism is robust to the final segmentation

544 process. Their static model, however, neglects the sequential development of the

545 boundaries and does not take into account any active processes within the tissue.

546

547 Given these differences we developed our own model of epithelial segmentation where

548 we identified four key parameters: the speed of the wave ( $W$ ), the rate of increase of

549 apical contractility ( $\lambda$ ), the maximum apical cell-cell junction load ( $T_{break}$ ), and the

550 aspect ratio of the cells ( $AR$ ) (Table 1). While the parameters have been chosen to

551 imitate segment size in chicken, we comment that we need better tuning of the aspect  
552 ratio of the cells in the dorsal region, where we found that cells can reach aspect ratios  
553 as high as 7. To compare results at these higher aspect ratios we would require re-  
554 parametrizing our cell volume to allow for sufficient apical surface so that the width is  
555 much greater than a chosen  $L_{AT}$ . While these changes are easily programmable, they  
556 come at a greater computational cost.

557

558 Other possible explanatory models include a cell clustering model (Figure 1E). Here we  
559 assume that the dorsal cells are initially confluent, but not tightly connected at their  
560 apical sides. As a wavefront of maturation passes, cells start to connect with their  
561 neighbors and condense initially into small groups, later clustering into larger, more  
562 tightly connected cohorts that eventually pattern the dorsal tissue into distinct tissue  
563 segments. Alternatively, instead of a continuous wavefront of activation/maturation, both  
564 processes (apical constriction and cell clustering) can be initiated at the center of the  
565 future segment by a small group of cells that eventually recruit and/or activate their  
566 neighbors (Figure 1F). This mechanism of initiation still assumes some kind of caudally  
567 moving wavefront, but also requires some positioning mechanism that may be provided  
568 as an earlier clock read-out. All those models, including the mechanical instability model  
569 explored here, provide an initial segmentation pattern that would later guide the  
570 formation of the full somite as the epithelialization process spreads to the ventral,  
571 medial and lateral sides of each forming epithelial sphere. These processes assume  
572 some kind of wavefront but are in principle independent of a clock, which is necessary  
573 for the molecular patterning of the somites into caudal and rostral identities [15].

574

575 We found that our purely mechanical model (Figure 1D) is able to produce spatially and  
576 temporally regular segment sizes. Similar to the CW models, segment sizes scale  
577 (increase) with higher wave speeds as seen in many species (Figure 4A). We found,  
578 however, that this scaling is not linear with wave speeds, as would be expected from a  
579 simple deterministic version of the CW model. There are two limits to this scaling  
580 behavior, which can be characterized by  $\Lambda/W$  ratios alone (Figure 5C). An upper limit in  
581 segment sizes is reached for low ratios ( $\Lambda/W < 4$ ), where initially formed segments are  
582 prone to splits due to mechanical instabilities; and a lower limit in the sizes is reached  
583 for high ratios ( $\Lambda/W > 22$ ), where segment sizes do not scale with wave speeds. These  
584 limits in somite size are absent in CW models and offer an explanation for the observed  
585 splitting of large somites formed in some perturbation experiments [42-43].  
586 Segmentation time in our model is not imposed but rather calculated as the difference in  
587 time for the appearance of the rostral and caudal boundaries. We find that it decreases  
588 with wave speeds and is insensitive to build-up rates (Figures 4D, 5D).

589

590 Our model predicts that disruptions in the protein levels of molecules (eg myosin, actin)  
591 that control the apical contractility of the PSM cells will affect the distributions of  
592 segment sizes. Upregulating these molecules will have a similar effect as increasing  $\lambda_A$   
593 (Fig 2C), leading to smaller segments. However, since the segment sizes in our model  
594 is also dependent on the sequential rostral-caudal activation of these molecules, we  
595 expect cases in which for a fixed tension load, segment sizes could become  
596 independent of the protein activity (similar to constant segment sizes in Fig 5C). Any

597 disruptions on the strength of the adhesion junctions between the PSM cells (equivalent  
598 to lowering  $T_{break}$  in our model) will also lead to smaller segments. We also comment  
599 that experiments with a continuous growing tissue as in [41] will differ from a fixed tissue  
600 model, as in the former case we will expect a reduction in the strength of apical links  $\lambda_A$ ,  
601 leading to larger segment sizes.

602  
603 Our model seems to have higher variations in the distribution of the segment sizes and  
604 formation time than existing mathematical implementations of the clock-and-wavefront  
605 model [14]. In a real 3D scenario however, epithelialization along the dorsal sides does  
606 not happen along a line as in our model, but within a plane that also extends along the  
607 medial-lateral direction. Addition of these neighboring cells into our model would likely  
608 reduce variation in segment size and segmentation time.

609  
610 While our mechanical model drastically differs from the CW family of models with  
611 respect to the absence of an intracellular molecular clock within prospective somite  
612 cells, it still assumes the presence of some sort of caudally travelling wave, which does  
613 not need to be the same as the one postulated by the CW. We are agnostic about the  
614 nature of this wave, which can be either a cell-autonomous maturation process (starting  
615 from their addition to the tail-bud or a similar event), a tissue level processes, such as a  
616 read-out of FGF and RA levels, or a combination of both [44]. As is often the case in  
617 biology, we speculate that mechanics and molecular based oscillatory signaling may  
618 work together to yield a robust morphological outcome.

619

620 Our current model, however, is too simple to explore such scenarios as it is restricted to  
621 a 1D view of the dorsal monolayer and is aimed to reproduce segmentation events prior  
622 to the formation of a full somite. Further developments of this basic model will include  
623 the self-organization of the PSM cells ventral to the dorsal monolayer and the expansion  
624 of the model to 3D. It is known that in chicken [17] different regions of the PSM  
625 epithelialize at different times, and it would be interesting to explore the implications of  
626 these observations in an augmented version of the mechanical model presented here.

627

## 628 **COMPUTATIONAL MODELS**

629

### 630 ***Linear elastic model***

631

632 We implement the interaction of adjacent cells as a series of springs of time-varying strength  
633  $\lambda_i(t)$  and resting length  $x_0$ , connecting a chain of  $N$  point objects. While the number of cells is  
634 finite, we set it large enough ( $N = 50$ ) such that in the time scale we consider, there are no  
635 significant edge effects and the chain is effectively infinite. Our model creates motion by linearly  
636 increasing the spring constant over time at a fixed rate ( $\Lambda$ ) from a minimum value  $k_0$  to a  
637 maximum value  $k_{max}$ , with a delay (or wave speed  $W$ ) based on how far along the chain the  
638 spring is. At each time step, the acceleration due to spring forces is calculated and used to set  
639 up a system of  $2N$  first order ODEs with time dependent coefficients. This time dependence  
640 means there is no practical way to solve this system analytically and we use MATLAB Ode45 to  
641 solve numerically how the cells interact over time. This is the simplest way to model this  
642 behavior since there are no random elements, and therefore this model cannot account for  
643 possible effects of viscosity or thermal fluctuations. However it means that the results we do get  
644 are precise and replicable.



645

646 Along with positions and velocities, tension in each spring is tracked over time. At each step, the  
647 tension of each spring is checked. If the spring exceeds a predetermined threshold tension  
648 ( $T_{break}$ ), the spring constant is set to zero for the remainder of the calculation, effectively  
649 breaking the spring. The time and location of each break is recorded.

650

651 At any given time, the acceleration of a point  $x_i$  connected by two springs is given by:

652

653 (Eq. X1) 
$$a_i(t) = \lambda_i(t) * (x_{i+1}(t) - x_i(t) - x_0) - \lambda_{i-1}(t) * (x_i(t) - x_{i-1}(t) - x_0)$$

654

655 Here  $t$  is time,  $i$  is the cell position number, and  $a_1 = a_N = 0$ , fixing the endpoints. Fixing the  
656 end could theoretically cause edge effects but the chain is long enough so that that first break  
657 always occurs before any wave behavior could reflect back into the system.

658

659 The spring constant and tensions at each cell neighboring pair are:

660

661 (Eq. X2) 
$$\lambda_i(t) = \min\left(k_{max}, k_0 + \Lambda * \left(t - \frac{i}{W}\right) * \theta\left(t - \frac{i}{W}\right)\right)$$

662

663 (Eq. X3) 
$$T_i(t) = \lambda_i(t) * (x_{i+1}(t) - x_i(t) - x_0)$$

664

665 Where  $\theta$  is the Heaviside function.

666

667 **CPM/GGH model**

668

669 We implement our full model as a simulation using the Cellular Potts (CPM), or Glazier-Graner-  
670 Hogeweg (GGH) model [23] written using the open-source CompuCell3D simulation  
671 environment [24]. The CPM/GGH framework represents each cell, or cell region as a collection  
672 of voxels that forms a domain within a fixed grid (here, square). An effective energy defines  
673 cell/domain properties such as size, mobility, adhesion preferences and distance constraints  
674 with other domains:

675

676 (Eq. 1)  $H = H_0 + H_V + H_I + H_A + H_B,$

677

678 where we defined each term below.

679

680 The initial configuration of all cells/domains evolve in time by a series of random neighboring  
681 pixel copy attempts whose acceptance is governed by a Metropolis algorithm, with a number of  
682 pixel-flips equal to the grid size defining the time unit of the simulation, a Monte Carlo Step  
683 (MCS).

684

685 Similar to what has been done in previously models [15,25], each cell is composed of 3 domains  
686 representing the apical, basal and core regions of an epithelial cell. The size of the domains is  
687 maintained by a volume constraint in the Hamiltonian:

688

689 (Eq. 2)  $H_{Volume} = H_V = \sum_{\sigma} \lambda_V (V(\sigma) - V_T(\sigma))^2,$

690

691 where the sum is over all domains ( $\sigma$ ),  $V(\sigma)$  is the current cell volume,  $V_T(\sigma)$  is the cell target  
692 volume, and  $\lambda_V$  is a lagrangian multiplier setting the strength of the constraint.

693

694 We defined the cell aspect ratio  $AR$  to be the ratio of apical/basal length to cell width. This ratio  
695 is maintained through spring-like distance constraints between the centers of mass of the three  
696 domains belonging to each cell:

697

$$698 \text{ (Eq. 3) } H_{Internal\ Links} = H_I = \sum_{\sigma, \sigma'} \lambda_I (L(\sigma, \sigma') - L_{IT}(\sigma, \sigma'))^2,$$

699

700 where the sum is taken over the three pairs of domains within each cell,  $L(\sigma, \sigma')$  is the current  
701 distance between the center of mass of the two domains,  $L_{IT}(\sigma, \sigma')$  is the corresponding target  
702 distance, and  $\lambda_I$  is the strength of the constraint. To prevent cells from bending we set the target  
703 distance between apical and basal domains equal to the sum of the target distance between the  
704 core domain to the apical and basal domains.

705

706 Adhesion between cells is modeled with the standard Potts model internal energy term:

707

$$708 \text{ (Eq. 4) } H_{Adhesion} = H_0 = \sum_{i,j} J(\sigma_i, \sigma_j),$$

709

710 where the sum is taken over all fourth-order neighboring pairs of grid coordinates  $i$  and  $j$ ;  $\sigma_i$  and  
711  $\sigma_j$  are the cell domains at grid coordinates  $i$  and  $j$ , respectively; and  $J$  is the contact energy per  
712 unit area between those domains.

713

714 Apical constriction is a cell autonomous process that may lead to tissue-level events, such as  
715 invagination, through the coupling of the internal contractile activity of actin-myosin cytoskeleton  
716 of neighboring cells with their adhesion junctions. Since we are interested only on the tissue  
717 level effects of this process, we model junctional adhesion and apical constriction similar to (Eq.  
718 3), with a distance constraint between neighboring apical domains:

719

720 (Eq. 5)  $H_{Apical\ links} = H_A = \sum_{\sigma, \sigma'} \lambda_A(\sigma, \sigma') (L(\sigma, \sigma') - L_{AT})^2,$

721

722 where the sum is taken over all pairs of neighboring apical domains,  $L(\sigma, \sigma')$  is the current  
723 distance between their center of mass,  $L_{AT}$  is the target distance between them, and  $\lambda_A(\sigma, \sigma')$  is  
724 the time-varying strength of the constraint. The target distance between neighboring apical  
725 domains is constant throughout the simulations and set to 3 pixels, a value much shorter than  
726 the initial width of the cells (10 pixels). Initially the constraint  $\lambda_A(\sigma, \sigma')$ , which we interpret here  
727 as the combined strength of apical cytoskeletal activity between cell pairs, is set very low ( $\lambda_A =$   
728 20), so that there is no effect on the tissue or individual cell shapes. A similar form ( $H_{Basal\ links}$ )  
729 is used for neighbouring basal domains with a fixed  $\lambda_B = 100$ . This term ensures that the top  
730 part of the tissue stays together once the apical compartments have separated.

731

732 Above the basal side of cells, there is a collection of domains representing the ectoderm and  
733 fibronectin- and laminin-rich extracellular matrix that forms a basal lamina [26]. These domains  
734 have a volume constraint and liable adhesion with the basal side of the epithelial cells that helps  
735 to maintain the alignment of the cells below them, while allowing some upward/downward  
736 movement of the cells. Below their apical sides, cells are adjacent to a loose mesenchyme  
737 (mainly corresponding to the future “core” of the somite, or somitocoel) which we choose to  
738 model as a single domain with no volume constraint and labile adhesion to the cells.

739

740 At the rostral and caudal ends of the row of cells, we include a single immotile cell, which does  
741 not change in shape or properties over time. Between them there are 115 to 205 cells,  
742 depending on the conditions being tested in the simulations. Apart from the fixed cells that make

743 the AP boundaries, all cells have identical properties and are allowed to change shape and  
744 properties during the course of the simulation.

745

746 Initially all cells are in an inactive state, without exerting significant forces on each other. We  
747 define a 'wave of constriction activation' which moves through the tissue from the rostral end at  
748 a fixed speed  $W$  (in units of cell/MCS), so that the next caudal cell is activated  $1/W$  MCS after  
749 the lastly activated cell. Apical constriction results from a linear increase in  $\lambda_A$  between a pair of  
750 activated cells. This variable varies from an initial value of 20 up to 600 at a specific build-up  
751 rate  $\Lambda = d\lambda_A/dt$  (in units of 1/MCS). As  $\lambda_A$  increases, the tension between a pair of cell's apical  
752 domains is:

753

754 (Eq. 6)  $T(\sigma, \sigma') = -2 \lambda_A(L(\sigma, \sigma') - L_{AT})$

755

756 When this tension value exceeds a maximum threshold  $T_{break} = -7500$  the link between the  
757 apical domains of neighboring cells is broken, resulting in the apical separation between the cell  
758 pairs.

759

760 Variation in cell aspect ratios was implemented by adjusting the internal distance constraints  
761 between domains in Eq. 3. We also choose to keep the total sum of all domain target volumes  
762 constant and adjust the initial width and length of the cells to satisfy the internal distance  
763 constraints.

764

### 765 **Reference Simulation Parameters**

766

767 Our simulations have 4 parameters, which we will vary systematically in this study:

- 768 1) *the wave speed  $W$* , at which the constriction front travels from the rostral to the caudal  
769 end of the tissue. The position of the front determines when and where cell pairs start  
770 increasing  $\lambda_A$ ;
- 771 2) *the rate of increase of apical contractility (build-up rate)  $\Lambda = d\lambda/dt$* , which determines  
772 how fast the cell pair  $\lambda_A$  increases once activated;
- 773 3) *the apical tension breaking threshold  $T_{break}$* , which determines the tension (Eq. 6) at  
774 which apical links between neighboring cells break (Eq. 5); and
- 775 4) *the cell aspect ratio  $AR$* , which defines how elongated the cells are at the beginning of  
776 the simulation.

777

778 The reference values of all 4 parameters can be found in (Table 1). Rest of the simulation  
779 parameters are listed in the Supplementary Materials.

780

| Parameter                          | Symbol      | Base value (units)        |
|------------------------------------|-------------|---------------------------|
| Wave speed                         | $W$         | 0.003 (cells/MCS)         |
| Apical contractility build-up rate | $\Lambda$   | 0.05 (MCS <sup>-1</sup> ) |
| Apical tension breaking threshold  | $T_{break}$ | -7500 (dimensionless)     |
| Cell aspect ratio (height/width)   | $AR$        | 2 (dimensionless)         |

781 **Table 1 - Reference values of the 4 key parameters of our model.**

782

783 **Metrics**

784

785 To analyze the behavior of our model with respect to variation in key parameters we define and  
786 measure the following metrics:

787 1) *Average Segment Size*  $\langle S \rangle$ : defined as the mean number of cells within each cohort in  
788 our simulations. We measure the sizes both during the course of the simulation - by  
789 taking into account the first occurrence of a separation located caudal to the caudal-most  
790 segment - and at the end of the simulation in order to assess the presence of any  
791 splitting events.

792 2) *Average Distance*  $\langle D \rangle$ : defined as the distance between the last activated cell pair  
793 and the last formed boundary of apical link breakage. This metric is measured during the  
794 course of the simulation and is presented in units of the average segment size  $\langle S \rangle$  for  
795 the corresponding set of parameters.

796 3) *Average Segmentation Time*  $\langle \tau \rangle$ : defined as the time (in MCS units) elapsed between  
797 the appearance of two consecutive boundaries.

798

799 To avoid boundary effects, all parameters are measured after the appearance of the first  
800 segmentation and before a distance of  $3 \langle S \rangle$  from the last formed segment from the rostral  
801 boundary.

802

803

## 804 **ACKNOWLEDGMENTS**

805

806 The authors would like to thank Dr. James P. Sluka and Ellen M Quardokus for helpful  
807 discussions. This work was supported by NIH grants R01 GM076992, U01 GM111243  
808 and R01 GM077138.

809

810

811



812 **REFERENCES**

813

- 814 1. Pourquié, O. (2001). Vertebrate Somitogenesis. *Annu Rev Cell Dev Biol*, 17:311-  
815 50. <https://doi.org/10.1146/annurev.cellbio.17.1.311>
- 816 2. Christ, B., & Ordahl, C. P. (1995). Early stages of chick somite development.  
817 *Anatomy and Embryology*, 191(5), 381–396. <https://doi.org/10.1007/BF00304424>
- 818 3. Cooke, J. (1975). Control of somite number during morphogenesis of a vertebrate,  
819 *Xenopus laevis*. *Nature*, 254(5497), 196–199. <https://doi.org/10.1038/254196a0>
- 820 4. Snow, M.H., Tam, PP. (1979). Is compensatory growth a complicating factor in  
821 mouse teratology? *Nature*, 279(5713), 555-557. <https://doi.org/10.1038/279555a0>
- 822 5. Stern, C. D., Fraser, S. E., Keynes, R. J., & Primmatt, D. R. N. (1988). A cell  
823 lineage analysis of segmentation in the chick embryo. *Development*, 104(SUPPL.),  
824 231–244.
- 825 6. Primmatt, D. R. N., Norris, W. E., Carlson, G. J., Keynes, R. J., & Stern, C. D.  
826 (1989). Periodic segmental anomalies induced by heat shock in the chick embryo  
827 are associated with the cell cycle. *Development*, 105(1), 119–130.
- 828 7. Collier, J. R., Mcinerney, D., Schnell, S., Maini, P. K., Gavaghan, D. J., Houston,  
829 P., & Stern, C. D. (2000). A cell cycle model for somitogenesis: Mathematical  
830 formulation and numerical simulation. *Journal of Theoretical Biology*, 207(3), 305–  
831 316. <https://doi.org/10.1006/jtbi.2000.2172>
- 832 8. Meinhardt, H. *Models of Biological Formation*. 2nd ed. London: Academic Press;  
833 1982.
- 834 9. Cotterell, J., Robert-Moreno, A., & Sharpe, J. (2015). A Local, Self-Organizing

- 835 Reaction-Diffusion Model Can Explain Somite Patterning in Embryos. *Cell*  
836 *Systems*, 1(4), 257–269. <https://doi.org/10.1016/j.cels.2015.10.002>
- 837 10. Cooke, J., & Zeeman, E. C. (1976). A clock and wavefront model for control of the  
838 number of repeated structures during animal morphogenesis. *Journal of*  
839 *Theoretical Biology*, 58(2), 455–476. [https://doi.org/10.1016/S0022-](https://doi.org/10.1016/S0022-5193(76)80131-2)  
840 [5193\(76\)80131-2](https://doi.org/10.1016/S0022-5193(76)80131-2)
- 841 11. Palmeirim, I., Henrique, D., Ish-Horowicz, D., & Pourquié, O. (1997). Avian hairy  
842 gene expression identifies a molecular clock linked to vertebrate segmentation and  
843 somitogenesis. *Cell*, 91(5), 639–648. [https://doi.org/10.1016/S0092-](https://doi.org/10.1016/S0092-8674(00)80451-1)  
844 [8674\(00\)80451-1](https://doi.org/10.1016/S0092-8674(00)80451-1)
- 845 12. Hester, S. D., Belmonte, J. M., Gens, J. S., Clendenon, S. G., & Glazier, J. A.  
846 (2011). A multi-cell, multi-scale model of vertebrate segmentation and somite  
847 formation. *PLoS Computational Biology*, 7(10).  
848 <https://doi.org/10.1371/journal.pcbi.1002155>
- 849 13. Tiedemann, H. B., Schneltzer, E., Zeiser, S., Hoesel, B., Beckers, J., Przemeck,  
850 G. K. H., & de Angelis, M. H. (2012). From dynamic expression patterns to  
851 boundary formation in the presomitic mesoderm. *PLoS Computational Biology*,  
852 8(6). <https://doi.org/10.1371/journal.pcbi.1002586>
- 853 14. Baker, R. E., Schnell, S., & Maini, P. K. (2006). A clock and wavefront mechanism  
854 for somite formation. *Developmental Biology*, 293(1), 116–126.  
855 <https://doi.org/10.1016/j.ydbio.2006.01.018>
- 856 15. Dias, A. S., De Almeida, I., Belmonte, J. M., Glazier, J. A., & Stern, C. D. (2014).  
857 Somites without a clock. *Science*, 343(6172), 791–795.

- 858 <https://doi.org/10.1126/science.1247575>
- 859 16. Nelemans, B. K. A., Schmitz, M., Tahir, H., Merks, R. M. H., & Smit, T. H. (2020).  
860 Somite Division and New Boundary Formation by Mechanical Strain. *IScience*,  
861 23(4), 100976. <https://doi.org/10.1016/j.isci.2020.100976>
- 862 17. Martins, G. G., Rifes, P., Amaândio, R., Rodrigues, G., Palmeirim, I., &  
863 Thorsteinsdóttir, S. (2009). Dynamic 3D cell rearrangements guided by a  
864 fibronectin matrix underlie somitogenesis. *PLoS ONE*, 4(10).  
865 <https://doi.org/10.1371/journal.pone.0007429>
- 866 18. Duband, J. L., Dufour, S., Hatta, K., Takeichi, M., Edelman, G. M., & Thiery, J. P.  
867 (1987). Adhesion molecules during somitogenesis in the avian embryo. *Journal of*  
868 *Cell Biology*, 104(5), 1361–1374. <https://doi.org/10.1083/jcb.104.5.1361>
- 869 19. Bénazéraf, B., Francois, P., Baker, R. E., Denans, N., Little, C. D., & Pourquié, O.  
870 (2010). A random cell motility gradient downstream of FGF controls elongation of  
871 an amniote embryo. *Nature*, 466(7303), 248–252.  
872 <https://doi.org/10.1038/nature09151>
- 873 20. Mongera, A., Rowghanian, P., Gustafson, H. J., Shelton, E., Kealhofer, D. A.,  
874 Carn, E. K., Campàs, O. (2018). A fluid-to-solid jamming transition underlies  
875 vertebrate body axis elongation. *Nature*, 561(7723), 401–405.  
876 <https://doi.org/10.1038/s41586-018-0479-2>
- 877 21. Meier, S. (1979). Development of the chick embryo mesoblast: Formation of the  
878 embryonic axis and establishment of the metameric pattern. *Developmental*  
879 *Biology*, 73(1), 25–45. [https://doi.org/10.1016/0012-1606\(79\)90135-0](https://doi.org/10.1016/0012-1606(79)90135-0)
- 880 22. Tam, P. P. L., Meier, S., & Jacobson, A. G. (1982). Differentiation of the Metameric

- 881 Pattern in the Embryonic Axis of the Mouse: II. Somitomeric Organization of the  
882 Presomitic Mesoderm. *Differentiation*, 21(1–3), 109–122.  
883 <https://doi.org/10.1111/j.1432-0436.1982.tb01203.x>
- 884 23. Graner, F., & Glazier, J. A. (1992). Simulation of biological cell sorting using a two-  
885 dimensional extended Potts model. *Physical Review Letters*, 69(13), 2013–2016.  
886 <https://doi.org/10.1103/PhysRevLett.69.2013>
- 887 24. Swat, M. H., Thomas, G. L., Belmonte, J. M., Shirinifard, A., Hmeljak, D., &  
888 Glazier, J. A. (2012). Multi-Scale Modeling of Tissues Using CompuCell3D. In  
889 Methods in Cell Biology (Vol. 110). [https://doi.org/10.1016/B978-0-12-388403-](https://doi.org/10.1016/B978-0-12-388403-9.00013-8)  
890 [9.00013-8](https://doi.org/10.1016/B978-0-12-388403-9.00013-8)
- 891 25. Belmonte, J. M., Clendenon, S. G., Oliveira, G. M., Swat, M. H., Greene, E. V.,  
892 Jeyaraman, S., Bacallao, R. L. (2016). Virtual-Tissue computer simulations define  
893 the roles of cell adhesion and proliferation in the onset of kidney cystic disease.  
894 *Molecular Biology of the Cell*, 27(22), 3673–3685. [https://doi.org/10.1091/mbc.E16-](https://doi.org/10.1091/mbc.E16-01-0059)  
895 [01-0059](https://doi.org/10.1091/mbc.E16-01-0059)
- 896 26. Rifes, P., Carvalho, L., Lopes, C., Andrade, R. P., Rodrigues, G., Palmeirim, I., &  
897 Thorsteinsdóttir, S. (2007). Redefining the role of ectoderm in somitogenesis: A  
898 player in the formation of the fibronectin matrix of presomitic mesoderm.  
899 *Development*, 134(17), 3155–3165. <https://doi.org/10.1242/dev.003665>
- 900 27. Stern, C. D., & Piatkowska, A. M. (2015). Multiple roles of timing in somite  
901 formation. *Seminars in Cell and Developmental Biology*, 42, 134–139.  
902 <https://doi.org/10.1016/j.semcd.2015.06.002>
- 903 28. Baker, P. C., & Schroeder, T. E. (1967). Cytoplasmic filaments and in the

- 904 amphibian. *Developmental Biology*, 15, 432–450.
- 905 29. Pilot, F., & Lecuit, T. (2005). Compartmentalized morphogenesis in epithelia: From  
906 cell to tissue shape. *Developmental Dynamics*, 232(3), 685–694.  
907 <https://doi.org/10.1002/dvdy.20334>
- 908 30. Martin, A. C., & Goldstein, B. (2014). Apical constriction: Themes and variations on  
909 a cellular mechanism driving morphogenesis. *Development (Cambridge)*, 141(10),  
910 1987–1998. <https://doi.org/10.1242/dev.102228>
- 911 31. Sawyer, J. M., Harrell, J. R., Shemer, G., Sullivan-Brown, J., Roh-Johnson, M., &  
912 Goldstein, B. (2010). Apical constriction: A cell shape change that can drive  
913 morphogenesis. *Developmental Biology*, 341(1), 5–19.  
914 <https://doi.org/10.1016/j.ydbio.2009.09.009>
- 915 32. Pearl, E. J., Li, J., & Green, J. B. A. (2017). Cellular systems for epithelial  
916 invagination. *Philosophical Transactions of the Royal Society B: Biological*  
917 *Sciences*, 372(1720), 0–3. <https://doi.org/10.1098/rstb.2015.0526>
- 918 33. Martin, A. C., Gelbart, M., Fernandez-Gonzalez, R., Kaschube, M., & Wieschaus,  
919 E. F. (2010). Integration of contractile forces during tissue invagination. *Journal of*  
920 *Cell Biology*, 188(5), 735–749. <https://doi.org/10.1083/jcb.200910099>
- 921 34. Manning, L. A., Perez-Vale, K. Z., Schaefer, K. N., Sewell, M. T., & Peifer, M.  
922 (2019). The *Drosophila* Afadin and ZO-1 homologues Canoe and Polychaetoid act  
923 in parallel to maintain epithelial integrity when challenged by adherens junction  
924 remodeling. *Molecular Biology of the Cell*, 30(16), 1938–1960.  
925 <https://doi.org/10.1091/mbc.E19-04-0209>
- 926 35. Thouless, M.D. Crack Spacing in Brittle Films on Elastic Substrates. (1990) *Journal*

- 927 of the American Ceramic Society. 73(7), 2144-46
- 928 36. Thouless, M. D., Li, Z., Douville, N. J., & Takayama, S. (2011). Periodic cracking of  
929 films supported on compliant substrates. *Journal of the Mechanics and Physics of*  
930 *Solids*, 59(9), 1927–1937. <https://doi.org/10.1016/j.jmps.2011.04.009>
- 931 37. Yuse, A., & Sano, M. (1993). Transition between crack patterns in quenched glass  
932 plates. *Nature*, 362(6418), 329–331. <https://doi.org/10.1038/362329a0>
- 933 38. Yuse, A., & Sano, M. (1997). Instabilities of quasi-static crack patterns in quenched  
934 glass plates. *Physica D: Nonlinear Phenomena*, 108(4), 365–378.  
935 [https://doi.org/10.1016/S0167-2789\(97\)00011-0](https://doi.org/10.1016/S0167-2789(97)00011-0)
- 936 39. Stopak, D., & Harris, A. K. (1982). Connective tissue morphogenesis by fibroblast  
937 traction. I. Tissue culture observations. *Developmental Biology*, 90(2), 383–398.  
938 [https://doi.org/10.1016/0012-1606\(82\)90388-8](https://doi.org/10.1016/0012-1606(82)90388-8)
- 939 40. Harris, A. K., Stopak, D., & Warner, P. (1984). Generation of spatially periodic  
940 patterns by a mechanical instability: A mechanical alternative to the Turing model.  
941 *Journal of Embryology and Experimental Morphology*, VOL. 80, 1–20.
- 942 41. Truskinovsky, L., Vitale, G., & Smit, T. H. (2014). A mechanical perspective on  
943 vertebral segmentation. *International Journal of Engineering Science*, 83, 124–137.  
944 <https://doi.org/10.1016/j.ijengsci.2014.05.003>
- 945 42. Stern, C. D., & Bellairs (1984). The roles of node regression and elongation of the  
946 area pellucida in the formation of somites in avian embryos. *Development*, 81, 75–  
947 92 <https://doi.org/10.1126/science.1075544>
- 948 43. Cooke, J. (1978). Somite abnormalities caused by short heat shocks to pre-neurula  
949 stages of *Xenopus laevis*. *Journal of Embryology and Experimental Morphology*,

950            *VOL. 45, 283–294.*

951        44. Dubrulle, J., McGrew, M. J., & Pourquié, O. (2001). FGF signaling controls somite  
952        boundary position and regulates segmentation clock control of spatiotemporal Hox  
953        gene activation. *Cell*. [https://doi.org/10.1016/S0092-8674\(01\)00437-8](https://doi.org/10.1016/S0092-8674(01)00437-8)

954

955
